# Supplementary material for: Dual functional quaternary chitosans with thermoresponsive behavior: structure–activity relationships in antibacterial activity and biocompatibility
Source: Royal Society of Chemistry journal article supplement (doi:10.1039/d3tb02066e), 2023-01-01
Supplement: d3tb02066e1.pdf [file d3tb02066e1.pdf]

## Supplementary Information

### **Dual Functional Quaternary Chitosans with Thermoresponsive Behavior: Structure-Activity Relationships in Antibacterial Activity and Biocompatibility**

Sedigheh Borandeh<sup>†</sup>, Isabella Laurén<sup>†</sup>, Arun Teotia, Jukka Niskanen, Jukka Seppälä\*

*Polymer Technology, School of Chemical Engineering, Aalto University, 02150 Espoo, Finland*

---

<sup>†</sup> Equal contribution

\* Corresponding author: [jukka.seppala@aalto.fi](mailto:jukka.seppala@aalto.fi)

## Schemes

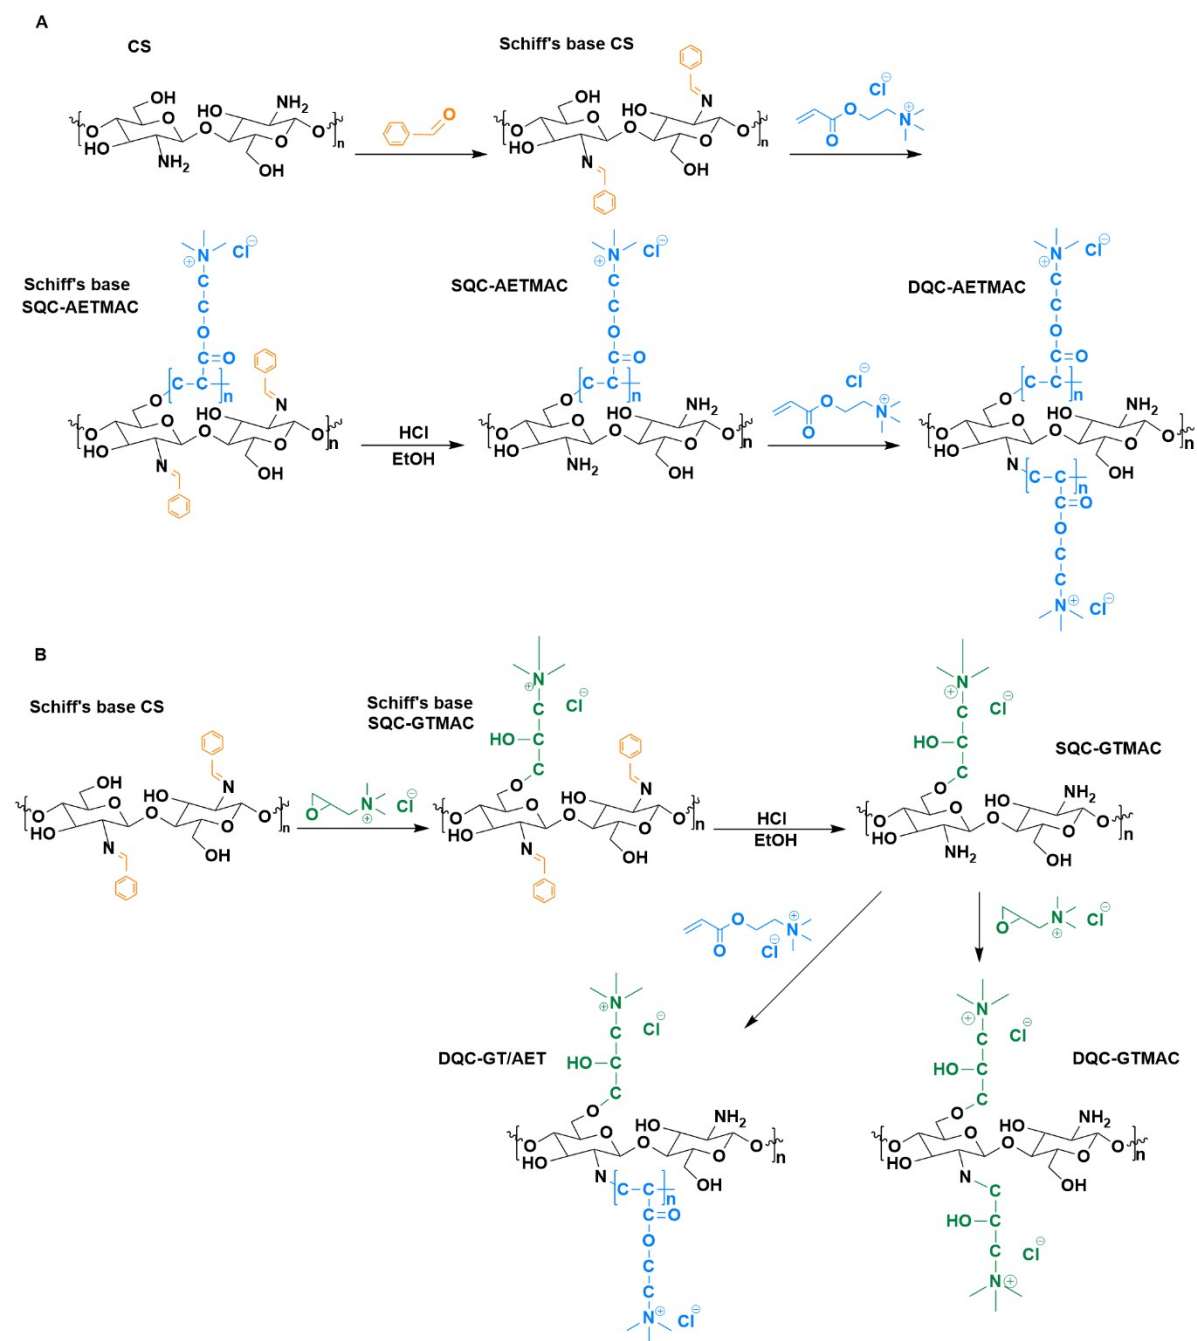

**Scheme S1.** Reaction schemes of the preparation of quaternized chitosan with **(A)** AETMAC and **(B)** GTMAC.

## Figures

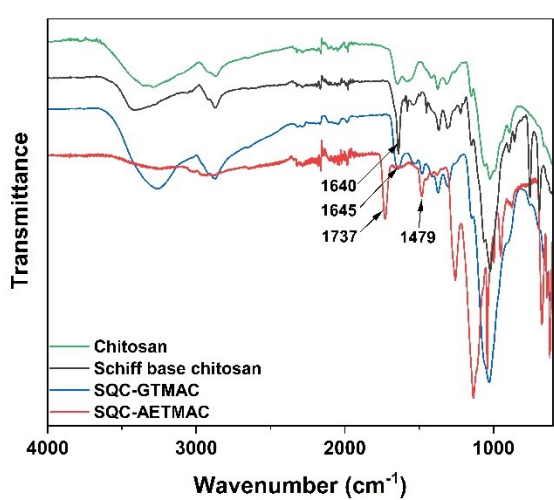

**Figure S1.** FT-IR spectra of chitosan and derivatives.

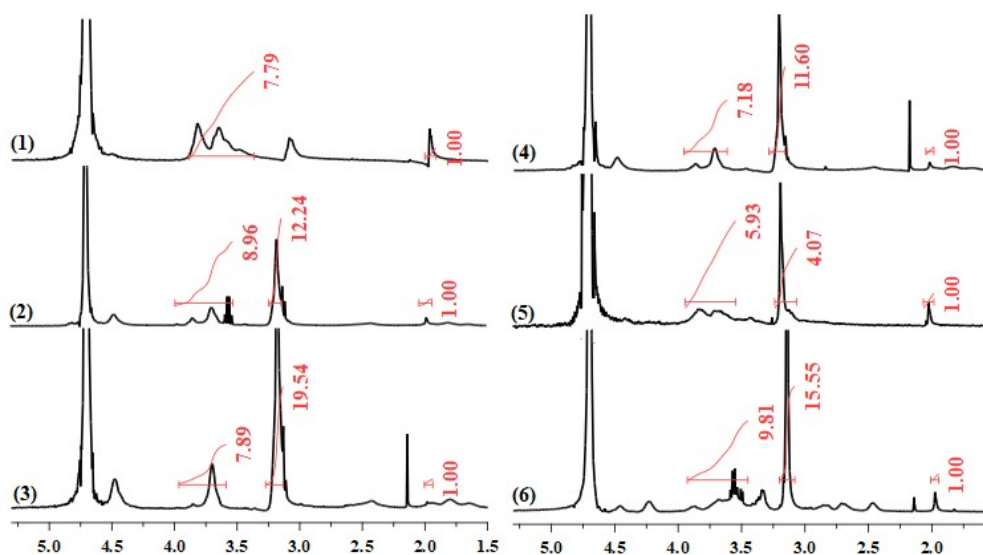

**Figure S2.**  $^1\text{H}$ -NMR spectra and integrals used for the determination of the degree of quaternization (dQ) and deacetylation (DDA), where 1-6 is chitosan, SQC-AETMAC, DQC-AETMAC, DQC-GT/AET, SQC-GTMAC, and DQC-GTMAC.

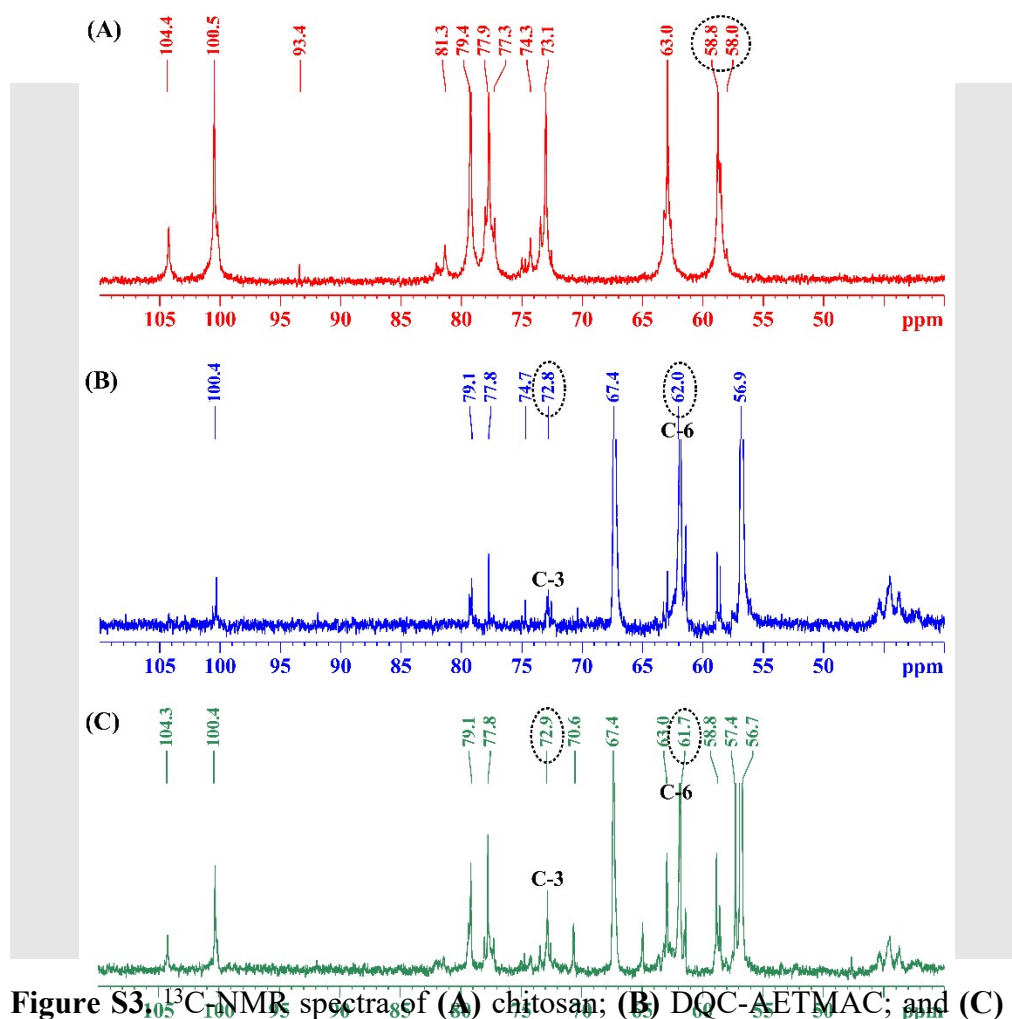

**Figure S3.**  $^{13}\text{C}$  NMR spectra of (A) chitosan; (B) DQC-AETMAC; and (C) DQC-GT/AET. DQC-GTMAC was excluded due to processing difficulties.

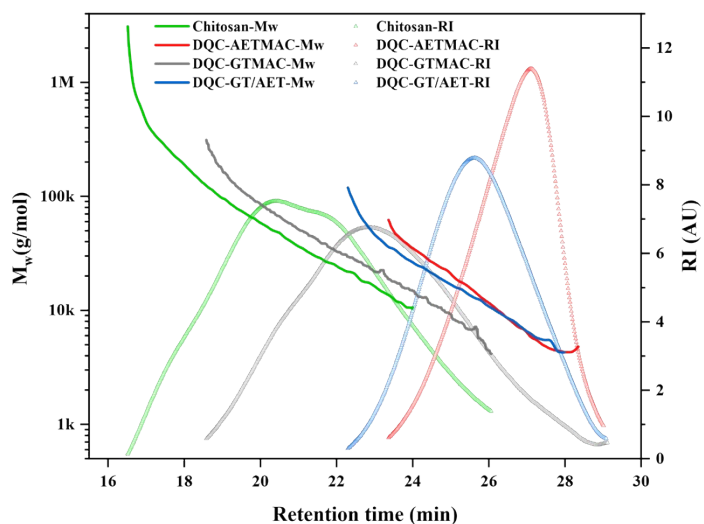

**Figure S4.** Results of GPC analysis: the obtained molecular weight ( $M_w$ ) and refractive index (RI) versus their respective elution time of chitosan and DQCs.

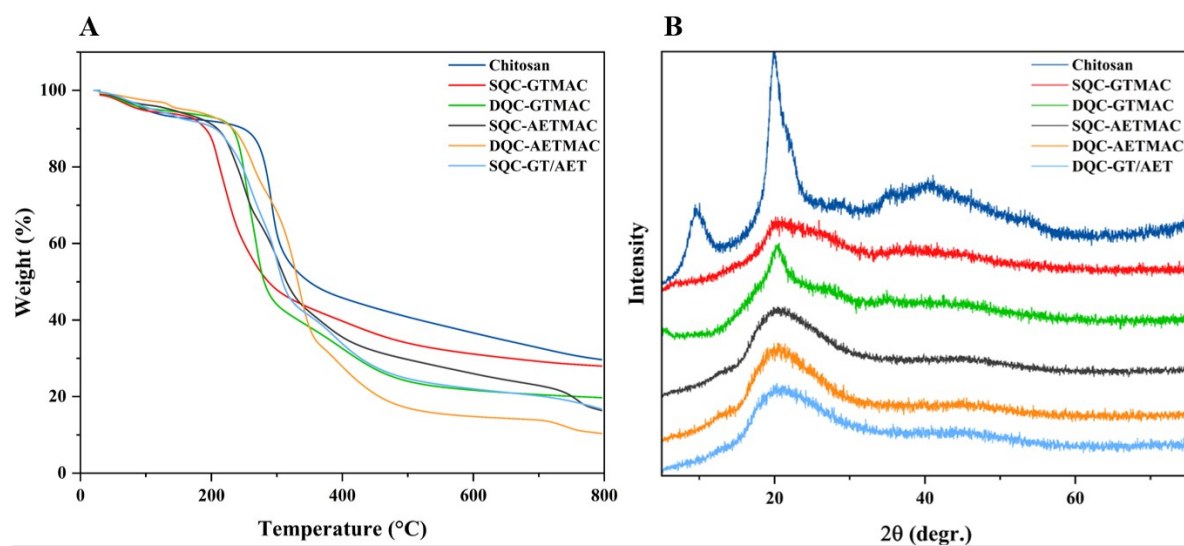

**Figure S5. (A)** TGA thermogram curves and **(B)** X-ray diffraction patterns of chitosan and its derivatives.

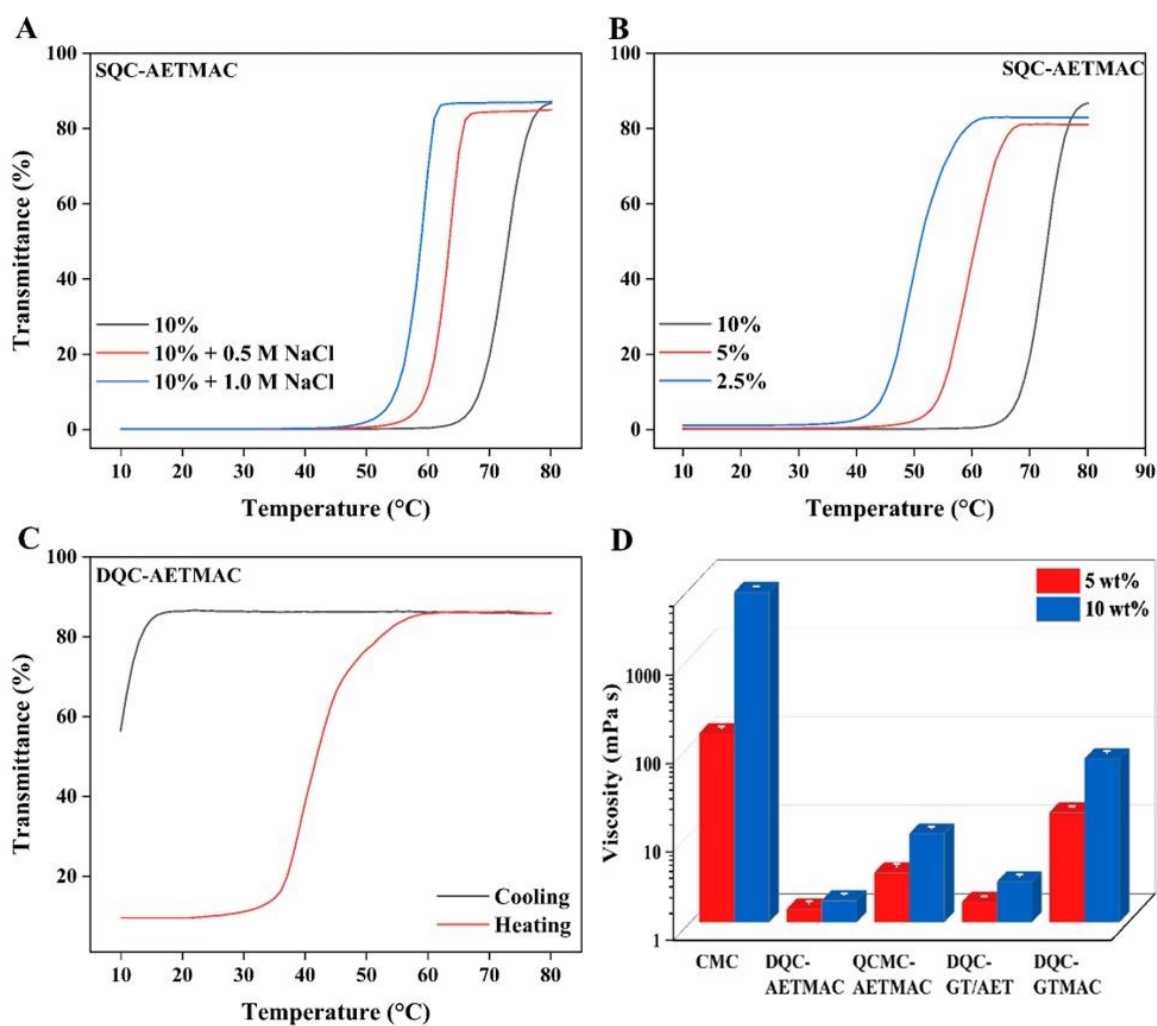

**Figure S6.** (A, B) UCST behavior of SQC-AETMAC during heating 10-80 °C, at different concentrations and with the addition of NaCl. (C) UCST behavior of DQC-AETMAC at a concentration of 10 % (w/v). (D) viscosity ( $\log_{10}$ ) of CMC and DQCs at 5 and 10 % (w/v) concentrations. Chitosan and QCMC-GTMAC were excluded due to too high viscosities.

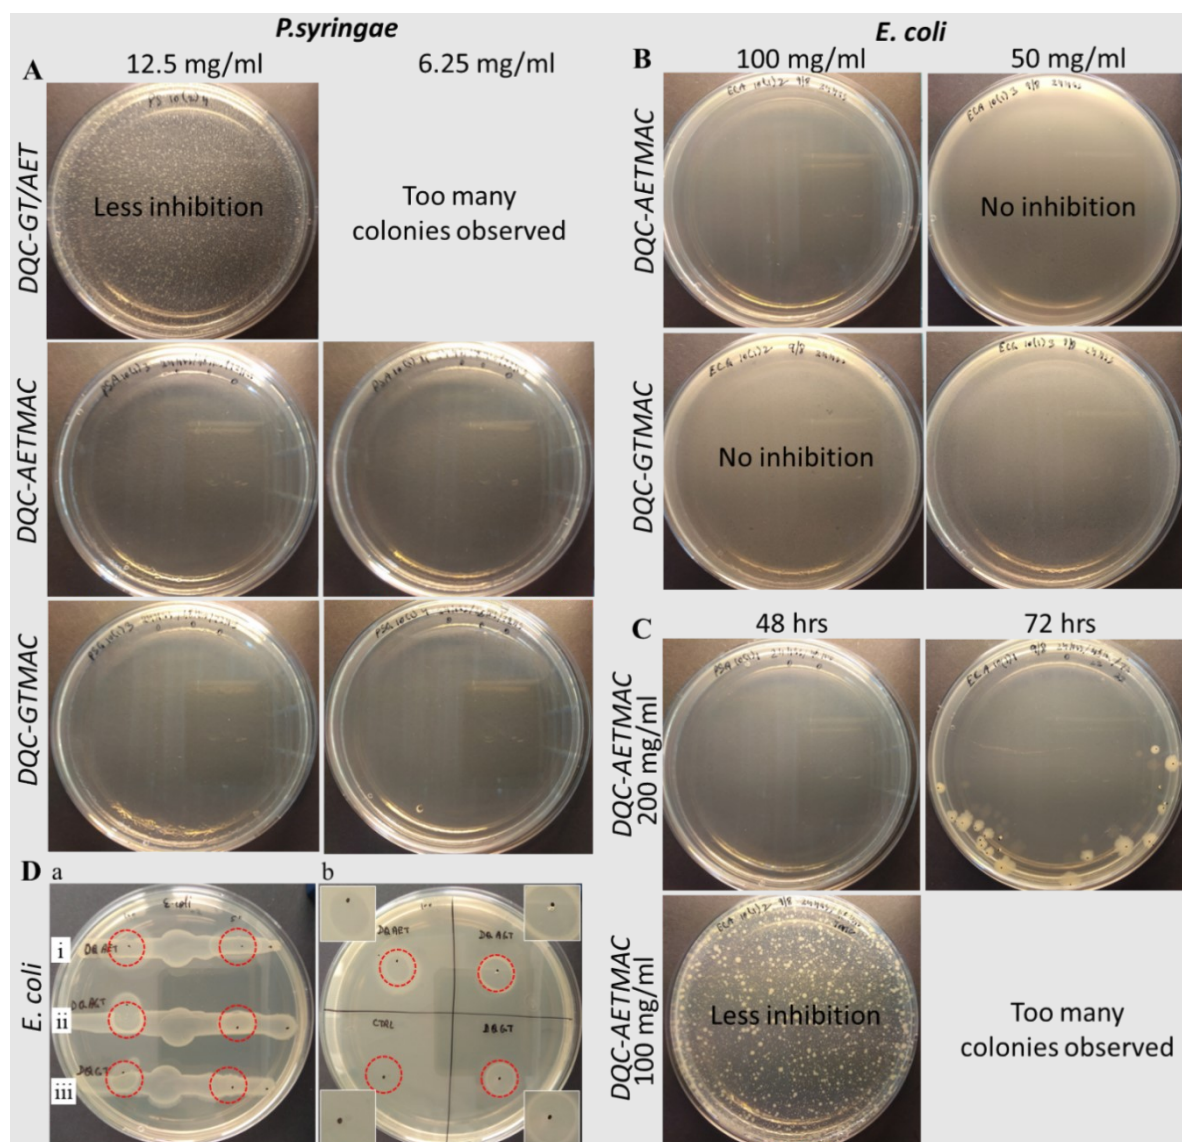

**Figure S7.** Antimicrobial activity analysis of representative chitosan derivatives on *P. syringae* and *E. coli* after 10 minutes of contact time. **(A)** Photograph showing antimicrobial activity of **(i)** DQC-GT/AET; **(ii)** DQC-AETMAC; and **(iii)** DQC-GTMAC, on *P. syringae* at 6.25 and 12.5 mg/mL of bioactive molecules, after 72 hours of incubation. **(B)** Photograph showing antimicrobial activity of **(i)** DQC-AETMAC; and **(ii)** DQC-GTMAC, on *E. coli*, at 100 and 50 mg/mL, after 24 hours of incubation. **(C)** Photograph showing antimicrobial activity of **(i)** DQC-AETMAC on *E. coli*, at 200 and 100 mg/mL, showing the number of CFUs observed after 48 and 72 hours of incubation. **(D)** Photograph showing zone of inhibition of different QCs for **(a)** streak, and **(b)** spread-plated *E. coli*, showing positive antimicrobial properties of QCs. (Inset 4x zoomed image).

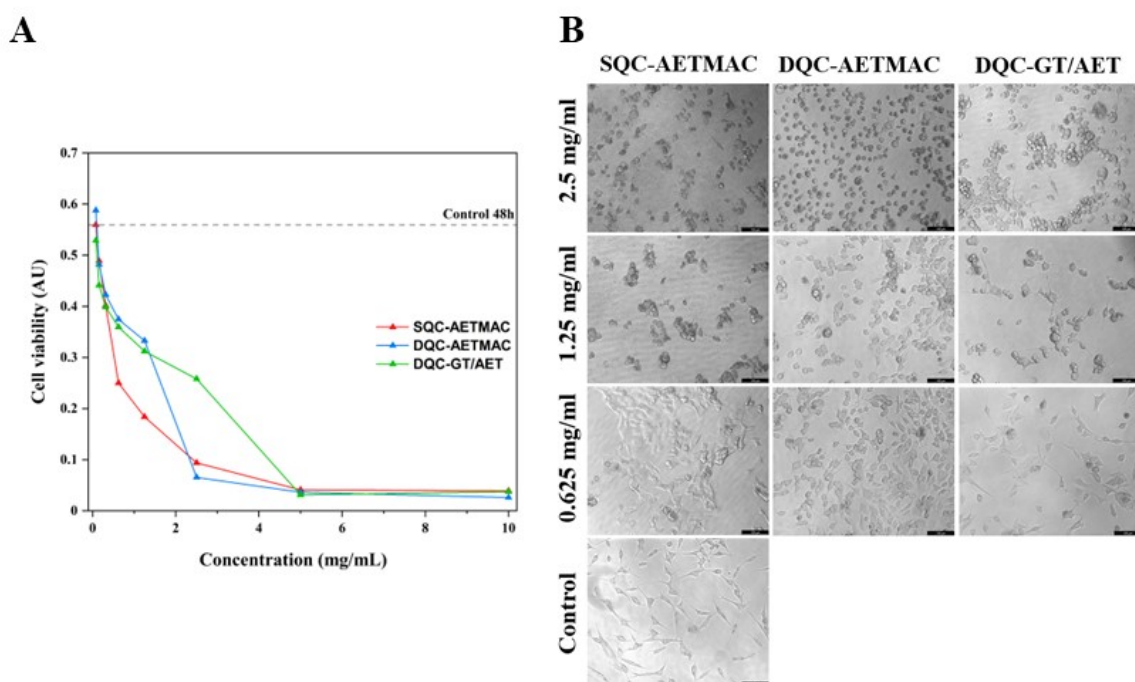

**Figure S8. (A)** Quantitative data of the cytotoxic behavior of quaternized chitosan on NIH-3T3 cells at different concentrations after 48h of incubation. **(B)** Microscopic images on NIH-3T3 cells after 24 h of incubation.

## Tables

**Table S1.** Concentration dependency of QCs on NIH-3T3 cell viability after 48 h of incubation (live/dead staining).

| Conc.<br>[mg/mL] | SQC-<br>AETMAC<br>%-Live | SQC-<br>AETMAC<br>%-Dead | DQC-<br>AETMAC<br>%-Live | DQC-<br>AETMAC<br>%-Dead | DQC-<br>GT/AET<br>%-Live | DQC-<br>GT/AET<br>%-Dead |
|------------------|--------------------------|--------------------------|--------------------------|--------------------------|--------------------------|--------------------------|
| 0.25             | 17.7                     | 82.29                    | 73.54                    | 26.19                    | 76.3                     | 23.7                     |
| 0.50             | 19.0                     | 80.96                    | 26.0                     | 73.0                     | 57.8                     | 42.1                     |
| 1.00             | 2.0                      | 98.0                     | 0.67                     | 99                       | 76.3                     | 23.7                     |
